# Supplementary material for: Optimization of RT-QuIC Assay Duration for Screening Chronic Wasting Disease in White-Tailed Deer
Source: Preprints.org preprint supplement (doi:10.20944/preprints202309.0559.v1), 2023-09-07
Supplement: Supplementary file 1 [file supplementary]

Supplementary Figure 1: Distributions of obex RT-QuIC MPR at various assay durations. Max-point ratio (MPR) distributions of CWD- and CWD+ controls of a gradient concentration were generated for assay durations corresponding to the a) 35th (10 hours), b) 97th (28 hours), and c) 159th (46 hours) cycle. ROC curves (d) were constructed using replicates from the 10-3 to 10-8 w/v concentrations to show the classifying power of MPR with obex at various assay durations.
